# Supplementary material for: Evaluation of knowledge and barriers of influenza vaccine uptake among university students in Saudi Arabia; a cross-sectional analysis
Source: PeerJ journal article supplement (doi:10.7717/peerj.13959), 2022-09-28
Supplement: Questionnaire_Arabic.pdf [file Questionnaire_Arabic.pdf]

## Data Collection form

### Knowledge, Perceptions and Barriers of influenza vaccine uptake among university students in Jouf, Saudia Arabia.

المعرفة والتصورات وحواجز تناول لقاح الأنفلونزا بين طلاب الجامعة في منطقة الجوف بالمملكة العربية السعودية

#### Part 1: Demographics

|                                                                                                                                                                                   |                                                                                                                                                                                                                                                                                                                                                 |
|-----------------------------------------------------------------------------------------------------------------------------------------------------------------------------------|-------------------------------------------------------------------------------------------------------------------------------------------------------------------------------------------------------------------------------------------------------------------------------------------------------------------------------------------------|
| <b>Student ID:</b> الرقم الجامعي                                                                                                                                                  | <b>Gender:</b> الجنس<br><input type="radio"/> Female                                                                                                                                                                                                                                                                                            |
| <b>Age:</b> (العمر)                                                                                                                                                               | <b>Marital status:</b> (الحالة الزوجية)<br><input type="radio"/> Single (أعزب)<br><input type="radio"/> Married (متزوج)<br><b>If married, please mention how many children</b> (إذا كنت متزوج ، أمل ذكر عدد الأطفال):                                                                                                                           |
| <b>No. of years in university</b><br>(عدد السنوات في الجامعة)                                                                                                                     | <b>Field of education</b> (مجال الدراسة في الجامعة):<br><input type="radio"/> Pharmacy college (كلية الصيدلة)<br><input type="radio"/> Preparatory (تحضيري)<br><input type="radio"/> Physical therapy (العلاج الطبيعي)<br><input type="radio"/> Business administration (إدارة أعمال)<br><input type="radio"/> Education college (كلية التربية) |
| <b>Routinely make own hospital appointment</b><br>(عادة، تقوم بحجز موعدك بنفسك في المستشفى):<br><input type="radio"/> Yes (نعم)<br><input type="radio"/> No (لا)                  | <b>Received flu vaccination anytime in childhood:</b><br>(في طفولتك، هل تم تطعيمك ضد الأنفلونزا)<br><input type="radio"/> Yes (نعم)<br><input type="radio"/> No (لا)                                                                                                                                                                            |
| <b>Received flu vaccination before joining university:</b><br>هل تم تطعيمك ضد الأنفلونزا قبل إنضمامك للجامعة؟<br><input type="radio"/> Yes (نعم)<br><input type="radio"/> No (لا) | <b>Received flu vaccination in the past 3 months (before arrival of winter)</b><br>هل تطعمت ضد الإنفلونزا في الأشهر الثلاث السابقة (قبل دخول فصل الشتاء)؟<br><input type="radio"/> Yes (نعم)<br><input type="radio"/> No (لا)                                                                                                                   |

## Part 2: Knowledge regarding Flu vaccination

(المعرفة بشأن التطعيم ضد الانفلونزا)

| Statement(العبارات)                                                                                                                                                                                                             | True (صحيح) | False (خطأ) |
|---------------------------------------------------------------------------------------------------------------------------------------------------------------------------------------------------------------------------------|-------------|-------------|
| All persons aged 6 months and above should get influenza vaccination annually<br>الأشخاص الذين يبلغون من العمر 6 أشهر و أعلى ، يجب عليهم الحصول على لقاح الأنفلونزا سنوياً                                                      |             |             |
| Influenza vaccination causes mild flu like symptoms<br>يسبب التطعيم ضد الأنفلونزا أعراض خفيفة شبيهة بأعراض الأنفلونزا                                                                                                           |             |             |
| Being vaccinated reduces the severity and duration of flu<br>التطعيم يقلل من شدة ومدة الأنفلونزا                                                                                                                                |             |             |
| Being vaccinated, improves immunity<br>التطعيم ، يحسن المناعة                                                                                                                                                                   |             |             |
| Infants and immuno-compromised population cannot get influenza vaccination<br>لا يمكن للأطفال الرضع والأشخاص ضعيفي المناعة الحصول على لقاح الأنفلونزا                                                                           |             |             |
| The complications of influenza can be severe leading to absence from schools and workplace, effecting quality of work<br>يمكن أن تكون مضاعفات الأنفلونزا شديدة تؤدي إلى الغياب عن المدارس ومكان العمل ، مما يؤثر على جودة العمل |             |             |
| Severe influenza can lead to hospitalization and even death<br>يمكن أن تؤدي الأنفلونزا الحادة إلى دخول المستشفى وحتى الموت                                                                                                      |             |             |
| Influenza vaccine provides coverage for all types of strains that cause flu<br>يوفر لقاح الأنفلونزا تغطية لجميع أنواع السلالات التي تسبب الإنفلونزا                                                                             |             |             |
| Influenza vaccine reduces the severity and duration of flu for all types of strains<br>لقاح الأنفلونزا يقلل من شدة ومدة الإنفلونزا لجميع أنواع السلالات المسببة لها                                                             |             |             |
| Influenza vaccine is not effective if I already got flu<br>لقاح الأنفلونزا غير فعال إذا أصبت بالفعل بالإنفلونزا                                                                                                                 |             |             |
| There are two types of influenza vaccine; intramuscular shot, intra nasal spray<br>هناك نوعان من طرق إعطاء لقاح الأنفلونزا ؛ حقنة بالعضل و رذاذ داخل الأنف                                                                      |             |             |
| The intramuscular influenza "shot" vaccine contains inactivated (killed) virus<br>لقاح الأنفلونزا العضلي يحتوي على فيروس غير نشط (خامل)                                                                                         |             |             |
| The intranasal influenza "spray" vaccine (FluMist) contains live attenuated virus<br>يحتوي لقاح "الرذاذ" للأنفلونزا داخل الأنف (FluMist) على فيروس موهن حي                                                                      |             |             |



### Part 3: Perceptions and Barriers to receive flu vaccination

تصورات وحواجز لتلقي التطعيم ضد الانفلونزا

| Statements                                                         | العبارات                                                                  | Strongly Agree<br>أوافق بشدة | Agree<br>أوافق | Neutral<br>محايد | Disagree<br>لا أوافق | Strongly disagree<br>لا أوافق بشدة |
|--------------------------------------------------------------------|---------------------------------------------------------------------------|------------------------------|----------------|------------------|----------------------|------------------------------------|
| Vaccines are expensive                                             | اللقاحات غالية الثمن                                                      |                              |                |                  |                      |                                    |
| I do not have time to get a flu vaccination                        | ليس لدي الوقت للحصول على تطعيم ضد الانفلونزا                              |                              |                |                  |                      |                                    |
| I do not know where to receive a flu vaccination                   | انا لا اعرف من اين احصل على التطعيم ضد الانفلونزا                         |                              |                |                  |                      |                                    |
| I do not believe that vaccines are effective                       | لا اعتقد ان اللقاحات (التطعيمات) فعالة                                    |                              |                |                  |                      |                                    |
| I believe that vaccines may have dangerous side effects            | اعتقد ان اللقاحات قد يكون لها آثار جانبية خطيرة                           |                              |                |                  |                      |                                    |
| I believe that flu vaccine causes flu and fever                    | اعتقد ان لقاح الانفلونزا يسبب الانفلونزا والحمى (ارتفاع درجة حرارة الجسم) |                              |                |                  |                      |                                    |
| I believe I will not get flu                                       | اعتقد أنني لن أصاب بالانفلونزا                                            |                              |                |                  |                      |                                    |
| I was not asked to get a flu vaccination by my doctor              | لم يطلب مني طبيبي ان احصل على تطعيم الإنفلونزا                            |                              |                |                  |                      |                                    |
| Flu is seasonal, It will recover on its own                        | عدوى الأنفلونزا موسمية ، وسوف اتعافى منها تلقائياً                        |                              |                |                  |                      |                                    |
| I don't want to get a flu vaccination because of religious reasons | لا أريد الحصول على لقاح ضد الأنفلونزا لأسباب تتعلق بديني                  |                              |                |                  |                      |                                    |
| I don't want to get a flu vaccination because of cultural reasons  | لا أريد الحصول على اللقاح ضد الأنفلونزا لأسباب ثقافية                     |                              |                |                  |                      |                                    |

### Part 4: Preparedness/ willingness to receive influenza vaccination

الاستعداد / الرغبة لتلقي لقاح الأنفلونزا

| Statement                                                                  | العبارات                                                                     | Yes<br>نعم | No<br>لا | Don't know<br>لا أعرف |
|----------------------------------------------------------------------------|------------------------------------------------------------------------------|------------|----------|-----------------------|
| I will regularly get a flu vaccine every year                              | سأحصل بانتظام على لقاح الأنفلونزا كل عام                                     |            |          |                       |
| I will get a flu vaccine only if myself or any of my family member got flu | سوف أحصل على لقاح الأنفلونزا فقط إذا أصبت أنا أو أحد أفراد أسرتي بالأنفلونزا |            |          |                       |
| I will get a flu vaccine only if my doctor recommends me                   | سأحصل على لقاح الأنفلونزا فقط إذا أوصى طبيبي بذلك                            |            |          |                       |

|                                                                                                                                                                                                                                                      |  |  |  |
|------------------------------------------------------------------------------------------------------------------------------------------------------------------------------------------------------------------------------------------------------|--|--|--|
| <p>I will get a flu vaccine only if yearly flu vaccination is made compulsory in National Immunization Program</p> <p>سأحصل على لقاح الأنفلونزا فقط إذا أصبح التطعيم السنوي ضد الإنفلونزا إلزاميًا في البرنامج الوطني للتحصين ضد الأمراض المعدية</p> |  |  |  |
| <p>I will get a flu vaccine if it is provided in university campus free of cost</p> <p>سأحصل على لقاح الأنفلونزا إذا تم توفيره في الحرم الجامعي مجانًا</p>                                                                                           |  |  |  |
| <p>I will get a flu vaccination via intramuscular shot (injection)</p> <p>سأحصل على لقاح الأنفلونزا عن طريق الحقن بالعضل</p>                                                                                                                         |  |  |  |
| <p>I will get a flu vaccination via intranasal mist/ spray</p> <p>سأحصل على التطعيم ضد الأنفلونزا عن طريق رذاذ / رش داخل الأنف</p>                                                                                                                   |  |  |  |
| <p>I will not get a flu vaccine in any case</p> <p>لن أحصل على لقاح الأنفلونزا على أي حال</p>                                                                                                                                                        |  |  |  |
